# Supplementary material
Source: publisher figshare collection journal article supplement (https://rs.figshare.com/ndownloader/files/18613694)
Supplement: Supplementary file 1 [file 18613694]

**Dogs perceive and spontaneously normalise formant-related speaker and vowel differences in human speech sounds**

**Authors:** Holly Root-Gutteridge, Victoria F. Ratcliffe, Anna T. Korzeniowska, David Reby

**ESM Table 4 LME results for speaker normalisation. Factors significant at Bonferroni corrected p < 0.007 are marked in bold.**

| **Source** | **Numerator df** | **Denominator df** | **F** | **Sig.** |
| --- | --- | --- | --- | --- |
| Intercept | 1 | 13 | 15.365 | **0.002** |
| Age | 1 | 13 | 0.234 | 0.637 |
| Group | 5 | 13 | 0.809 | 0.564 |
| Location | 2 | 13 | 1.019 | 0.388 |
| Mix | 1 | 13 | 1.083 | 0.317 |
| Sex | 1 | 13 | 4.594 | 0.052 |
| Trial | 5 | 115 | 5.421 | **0.000** |
